# Supplementary material for: Autophagy compensates for Lkb1 loss to maintain adult mice homeostasis and survival
Source: eLife journal article supplement (doi:10.7554/elife.62377), 2020-11-25
Supplement: supp [file elife-62377-supp-v1.zip]

Archive with 8 entries (8 files):
- elife_poa_e62377_Transparent_Reporting_File.pdf
- elife_poa_e62377_Figure_1_figure_supplement_1.pdf
- elife_poa_e62377_Figure_2_figure_supplement_1.pdf
- elife_poa_e62377_Figure_3_figure_supplement_1.pdf
- elife_poa_e62377_Figure_4_figure_supplement_1.pdf
- elife_poa_e62377_Figure_5_figure_supplement_1.pdf
- elife_poa_e62377_Source_data_1.xlsx
- elife_poa_e62377_Source_data_2.xlsx
