# Supplementary material for: Autophagy compensates for Lkb1 loss to maintain adult mice homeostasis and survival
Source: eLife journal article supplement (doi:10.7554/elife.62377), 2020-11-25

Figure 5-figure supplement 1

**a Intestine amino acids**

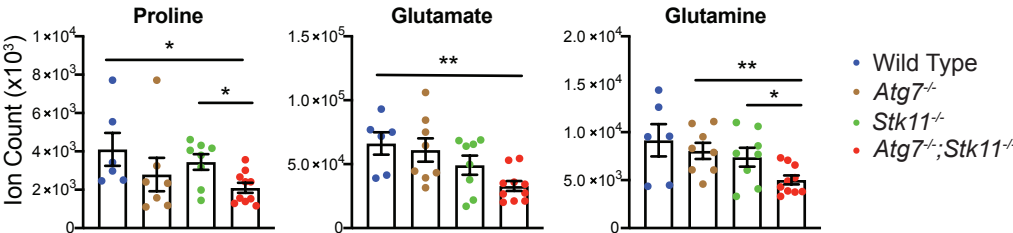

**b Intestine TCA-cycle metabolites**      **c Intestine urea cycle metabolites**

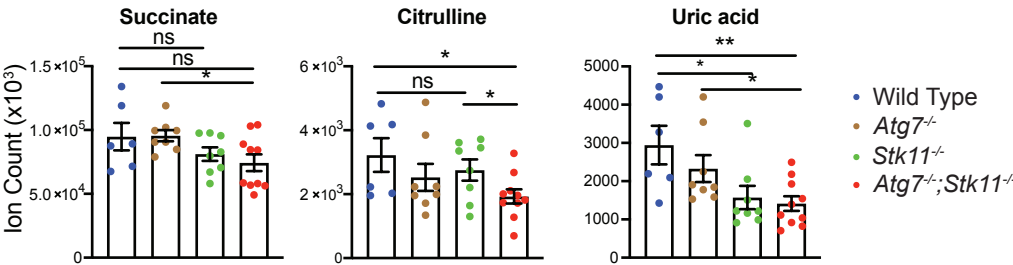

**d Intestine glycolysis pathway metabolites**

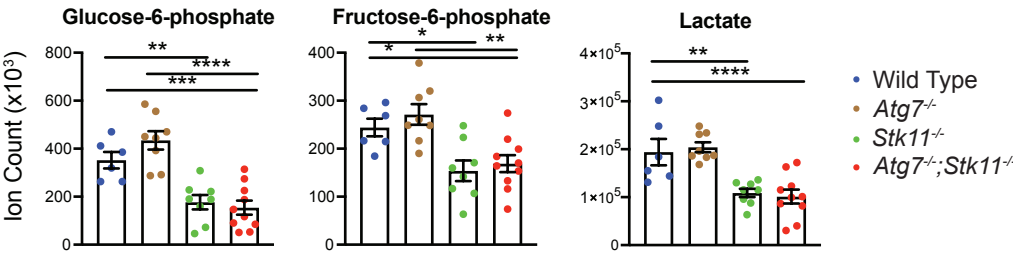

Supplement: supp [file elife-62377-supp-v1.zip › elife_poa_e62377_Figure_5_figure_supplement_1.pdf]
