# Supplementary material for: Autophagy compensates for Lkb1 loss to maintain adult mice homeostasis and survival
Source: eLife journal article supplement (doi:10.7554/elife.62377), 2020-11-25
Supplement: supp [file elife-62377-supp-v1.zip › elife_poa_e62377_Source_data_1.xlsx]

## Sheet: Sheet1
Data Source. Table 1. Levels of metabolites in the sera of mice measured by LC_MS
Mouse strain	wild type control						Atg7-/-								Stk11 -/-								Atg7 -/- ; Stk11 -/-
Compound	Serum_6701_1	Serum_6701_2	Serum_1341_1	Serum_1341_2	Serum_1342_1	Serum_1342_2	Serum_1357_1	Serum_1357_2	Serum_1542_1	Serum_1542_2	Serum_330_1	Serum_330_2	Serum_558_1	Serum_558_2	Serum_1301_1	Serum_1301_2	Serum_1303_1	Serum_1303_2	Serum_1304_1	Serum_1304_2	Serum_684_1	Serum_684_2	Serum_690_1	Serum_690_2	Serum_1213_1	Serum_1213_2	Serum_1221_1	Serum_1221_2	Serum_571_1	Serum_571_2	Serum_613_1	Serum_613_2
Glycine	202939	212080	271659	260082		463760	284410	393660	212896	257562	167149	186555	154795	128581	137412	111338	144087		198395	132961	282825	418381	138243	114544	177884	147175		141976	124256	126110	75219.3	166335
Pyruvate	2171841	2240728	1537846	1520973	1640465	2209136	2491999	2624756	1641236	1850530	1803176	1727391	2302041	2073266	1785064	1417740	1728763	1635659	1728179	2823260	1508252	2175331	1033949	820007		1917813	1514001	1426919			961652	970993
Alanine	1446688	1579061	2988785	2749206	1902992	2080548			1351740	1518594	1188874	1143154	2403585	2513339	2201231	2098036	860021	825423			1463612	2041698	1180028	1021365	1777921	1669602	1144753	1191306	744930	641244	1060346	1000654
Lactate	174000000	183000000	250000000	261000000	216000000	264000000	245000000	266000000	126000000	145000000	133000000	127000000	180000000	167000000	98900000	83800000	124000000	113000000	119000000	160000000	92200000	127000000	116000000	99300000	162000000	139000000	101000000	95800000	48200000	46900000	102000000	106000000
2-Oxobutanoate	403775	427822	118801	115903	149590	193445	110770	126408	278886	323873	575577	518998	372240	306782	1680534	1477288	1902758	1798084	1228016	1728147	561125	818882	178729	138715	878394	833473	1396657	1425586	143922	129663	1036184	1066098
gamma-amino butyrate	12089.3	10317.3	14526.6	16102.7	13189.2	22659.2	17584.7	11417.7	13302.3	10667.1	16885.8	11227.4	26543.9	27647.7	50537.6	49497.5	48485.9	47024.8	11609.3	23365.3	69925	96974.1	20891.5	18020.2	17310.7	17559.4	40350.6	39037.6	18921.8	22852.2	21307.9	14590.6
Dimethylglycine	42209.8	35779.2	47846.2	39150.8	44503	48328.5	35583.5		7060.73	24721.4	43715.8	46928.2	44904.9	45860.4	44641	52561.1	56935.3	63386		22973	26318.6	49398.2	17716.5	10977.3	9191.33	13804	26300.1	27759.8	25305	5729.18	11168.9	10301.5
Malonic acid	104428	79913.5	74376.7	60965.6	71897.3	112894	188834	81402.1	64365	74544.6	73530	84269.6	65613.5	76066.5	594737	628186	434080	443648	91692	321904	66512.3	69751.1	70682.5	72573.7	59554	78380.3	90885.6	92072.4	78516.8	70016.8	92424.1	94098.2
3-Hydroxybutyric acid	9051976	9652601	2551997	2747949	3444212	4335756	2612338	2630855	6198448	6589292	13100000	13100000	13400000	12600000	30000000	23900000	24200000	24800000	12800000	16800000	5184016	6906170	976351	838361	11800000	9868959	11400000	11200000	643047	611652	16300000	16800000
Serine	648415	607647	1085169	1040746	788479	836561	1148406	1261082	557764	584152	455536	468701	661202	660335	262020	234284	226107	248896	192868	312436	482376	658160	451923	358282	331443	337565	352936	381225	406092	376376	237342	201774
Glycerate	78997	67554.2	85973.2	115783	65588	70120.5	116901	124681	50754.4	55590.6	58810.9	57147.4	47913.9	51063.5	78174.1	59515	67326.5	87453.8	43275.6	62954.4	61768	75398.4	47884.3	47735.2	86754.6	55219.9	100140	90680.4	44671.6	31079.7	40495.6	17285.6
Cresol	123459	104493	37870.4	69231.1	71577.2	41773.6	79951.1	101415	64469.8	76011.2	111942	116993	43326.8	57278.6	138762	146579	64694.9	67420.9	64192.4	73502.1	305783	409969	41266.1	14678	328975	357670	388004	315646	509563	517223	129049	218612
3-Furoic acid	72796.5	111260	71383.9	64242.2	92673.9	120292	80775.9	85558.9	211951	142622	104103	156423	141901	119425	141886	125936	118285	103735	96708.3	112320	22406.6	21684.4	12469.4	12275.7	100234	108452	68199.9	80628	32484.8	51045.6	49907.4	28894.5
Uracil	186605	159137	220225	242282	270726	289178	275103	350750	101455	111724	88408.1	84504.9	111491	108633	259306	244469	247050	339866	292457	223415	565725		291619	231762	230341	221627	214692	224080	194004	202261	159960	144782
Proline	453034	502277	655697	589976	568581	600818	698005		358309	377210	310514	306580	375046	392110	255824	235854	224032	236821	202255	258127	351420	481847	291789	277672	234780	227856	244536	264832	246370	199920	164075	140570
2-Ketoisovalerate	1364692	1544356	1877170	1952740	1347869	1475247	1450740	2052952	902459	1083582	1427139	1179143	1497739	1337733	2008008	1463606	2488462	2339934	1667083	2019533	1850550	2685725	1037928	711204	1251899	1178564	1290182	1088663	880266	912328	1224730	773792
Acetyl glycine	750466	699118	344677	248267	512348	455974	371048	560263	405014	392599	512151	509489	409740	440628	649793	776800	471233	522117	444470	574497	256177	356423	135855	110547	223565	259891	411024	401820	68369.5	54379.1	308872	279257
Guanidinoacetate	71664.9	85587.5	101514	96443.9	73154	81033.4	96296.5	111436	58683.7	60203.9	65281.5	57364	61963.7	62974.7	113628	80153.9	133380	124317	81034	117159	92898.1	140831	34693.8	36319.8	73694.1	49562.2	73835.7	58150.3	51568.2	49065.5	66672.6	39239.5
Valine	2574476	2634786	2741699	2666544	1737135	1782497	2160446	2541903	982133	1069842	1674680	1606904	1778510	1757573	962023	969688	1602461	1441123	1136242	1282642	1760883	2223861	1971667	1866893	823560	839915	1312056	1290726	1796314	1794412	596554	584868
Succinate	6947414	6996666	8072184	7392746	5611142	7281188	8214470	9849805	2717977	2896289	2786536	2907619	4815510	4775492	3731207	3799656	2998025	4313344	2629913	1996485	6119122	7396928	2757550	2087072	2587648	2891402	2067547	2032507	2487427	2317616	2563381	2544977
2-Hydroxy-3-methylbutyric acid	1461849	1434512	2585846	2582449	1345100	1562617	915514	936871	419595	454462	622969	615960	253533	231411	5596098	4868864	5288894	5535652	2592976	3776603	3649220	5224460	703387	585734	571246	515223	390730	346775	566468	582949	885256	897553
Threonine	581551	580551	774260	741008	519967	478058	724772	840942	296253	353486	376582	365795	529321	477303	182556	144380	169205	198082	160858	262421	352002	443527	505014	410229	177372	186432	275009	260240	416126	346575	131016	125219
Taurine	3387674	3482935	6563740	6441300	4161674	4148652	13100000	18300000	3762017	3927544	2144054	2033059	5566844	5131810	8465595	7896006	2619464	2684543	1772218	1936774	3612514	4949622	3490368	3021885	5105435	5665460	3067971	3160712	1399708	1329515	5220018	5227318
2 4-Diamino-6-hydroxypyrimidine	20200000	21100000	27500000	27400000	12900000	13300000	52800000	59100000	21800000	22200000	21800000	20700000	31900000	32100000	11300000	10900000	19400000	19300000	19100000	20500000	19800000	22600000	12700000	11500000	30300000	31600000	28300000	27900000	8343962	7812700	46000000	43600000
Pyroglutamate	956030	962694	3499480	3504085	1084571	1230820	3567841	4209460	870912	887562	699704	700813	1506334	1756914	1101058	1011120	674870	888762	613882	743524	1589198	2262238	745423	706377	2157199	1854878	1497941	1401636	465096	433153	825603	677447
Methyloxovaleric acid (Ketoleucine)	14400000	16800000	15200000	15800000	11400000	13800000	15900000	16800000	8696505	8571979	10800000	9681829	14800000	13000000	11300000	8813452	12000000	11600000	11400000	15300000	11100000	15100000	8274072	6672868	9678817	8403794	12200000	11500000	8140676	7106178	9211910	8541776
N-Acetyl-L-alanine	42133.3	39714.4	38137.9	37502.4	49848.1	46585.3	29005.9	65031.8	40986.9	40051	28739.4	29467.3	32558.1	40745.2	165041	195184	135360	137708	68713.8	86378.6	125446	154735	94383.3	92276.4	55294.3	44487.6	78223.3	83208.3	85130.7	87342	67680	48155.8
Creatine	378304	346638	891888	887279	497197	489988	2357448	3090331	341880	417007	249362	242317	866037	865506	1134597	1052317	322362	304602	162864	233750	491152	693781	466612	390663	875557	832201	491829	451951	223769	178662	508142	483809
Leucine	4484057	4499298	4309028	4374200	2597001	3004950	3189013	3634198	1440540	1491319	3129904	3067713	3093317	3030733	1872042	1688772	3116429	2993917	2194675	2807092	2628663	3566582	3700236	3216430	1286494	1315445	2481807	2489968	2720365	2648966	984236	1015085
Asparagine	248632	232381	315482	274202	359944	473074	335285	436802	179849	203338	200761	206926	211895	202742	91266.2	86421.6	115063	132588	85692.4	105611	156237	196910	158634	150976	98048.6	80693.5	128959	127237	127468	146683	78799.7	68231.2
Leucic acid	325188	355818	517509	539178	337956	433011	280141	319547	93588.9	124009	207607	156927	55908.1	52031.4	1128114	971086	1008913	1007569	520804	753527	986332	1458197	228932	191162	84957.3	88220.1	51355.9	69887.2	147920	151345	337019	316291
Ornithine	148962	138901	198678	186710	138324	163657	123948	147383	83973	86951.4	195686	154463	140702	194702	103855	112744	141626	156098	54876.6	62531.9	138056	177974	108264	86948.8	77923.2	63540.3	123500	137666	129744	110084	60825.6	43267.9
Aspartate	46379.5	42249.6	93216.3	77467.9	52978.5	47629.7			30852.2	35842.5	16538.2	20761.7	57735.9	54932	24891.6	12662	14676.6	23189.2	22542	27038.5	22576.4	36494.3	24450	18685.6	22203.7	21927.9	39689.3	28393.4	15411.4	16607	4983.41	4039.8
Malate	2168192	2136182	2356666	2128916	2162774	2729490			887801	1117983	1110111	1037409	1391219	1403672	3373797	3322547	2162974	2071708	1391544	3840519	1455911	1909012	625406	652542	1132001	1362012	1030845	905155	506551	499258	1863089	1725747
Threonic acid	196098	147604	393166	280141	96702.5	135819	625506	643372	130346	144667	87384.4	62209.9	270968	236399	268273	295459	114901	215029	128516	230814	124088	199422	138814	40820.2	190376	215815	266968	247243	145888	75174.3	82981.5	106209
Urocanic acid	147366	137004	570747	575619	132616	139551	431627	497624	82514.4	88309.9	52707.6	46194.7	168964	161302	128802	111297	71048.1	93266	51122.2	75268.4	251829	417433	105125	89134.5	229435	197984	150625	143889	29891.2	42841.3	94998	79719.9
a-ketoglutarate	444526	481914	258325	253660	618436	806191	517429	9226.76	270590	307549	46224.3	320279	20922.5	259228	704976	70251.1	627715	546364	435445		458278	649719	14921.7	244857	277019	322124	298144	307776	118601	45700.2	16326.1	464943
Glutamine	7781468	7958776	8096938	7404934	7093680	8345378	8669912	10800000	6876712	7558826	11300000	10700000	10800000	9509640	4901336	4379888	4846412	4747244	3995244	5055564	4327024	5808750	6476194	5381504	4709004	4332442	5094982	4852006	4757818	4402860	2964283	2862093
Lysine	887871	777911	1612551	1514431	897220	956238	1497530	1678098	649963	688955	653933	515000	596818	654856	467842	468124	645835	692411	395422	471848	439791	629190	477513	450399	466712	360923	452298	535395	806866	724037	211040	166666
Glutamate	401457	408751	1097729	1001022	534594	619702			358463	370315	289763	290498	716699	674811	312268	326864	230672	245157	216078	278663	319261	449112	210033	213491	296036	299092	343829	324931	164467	161580	205531	210387
2-Hydroxyglutarate	346558	337012	324714	301840	257005	321013	947304	682551	266865	323394	246715	258186	200736	219845	907696	838417	580229	629339	374705	800908	348424	497108	382262	320145	531285	529290	386516	380494	413241	362029	539646	487393
Cinnamic acid	33882	36906.4	34905.8	36267.7	24319.5	48584.2	34137.3	45650	9167.56	12308.2	24357.1	14303.4	19386.8	24478.6	37344.7	34374.3	40386.2	35636.3	27151.5	28923.5	41608.2	53666.9	53711.1	36605.9	25081.5	14670.3	34360.4	34664.7	44265.8	49988.4	9729.89	18971
Methionine	475802	506332	506524	569244	515612	642763	655898	718590	359732	419949	659668	403135	461675	472232	160645	154295	182266	170359	138866	186038	254428	358956	307193	268617	157061	149222	232152	236484	252642	237003	118144	107059
Lyxose	11686.3	8006.76	19956.5	35545.1	21396.8	36303.1	22510.5	34044.3	33506.7	44721.4	10413.2	3745.68	33224.1	35967.5		167121	8809.22	25703.8	8749.63	5447.7	154102		74210.9	61613.9	164603	147664	126964	125081	10397.3	11213.4	73418.9	64419.7
DL-Arabinose	467199	493629	590066	476620	520266	433798	678827	1091673	628103	631407	438408	404137	572155	513442	198720	249440	163367	178832	275631	300892	157651	309862	169929	182220	278796	295542	439201	374531	71677.8	56469.3	281540	249388
D-Xylose	46684.8	39446.1	39061.2	48105	27757.2	42893.3	71058.5	93188.3	38096.3	39964.9	75756.5	77726.3	75856.9	68953.1	28204.1	24618.3	33770.4	57570.7	26853.6	32958.4	28074.9	29755.6	58411.7	47692.3	25515.8	21139.5	61119.1	57149	61504.9	58707.3	46356.6	48369.6
Ribitol	90153.5	101094	103126	105258	57484.6	85673.9	123303	134852	68382.8	91235.4	109692	89772.5	79562.3	79172.7	113380	99144.2	85036	88776.2	81848.9	81834.8	50282.5	55735.8	31761.8	24870.9	91537.8	90376	79736	75381.9	20021.4	18060.5	51466.8	59933.5
D-Arabitol	59204.9	70301	68106.1	71949.9	47082.1	62541.5	63187.9	78567.6	45958.8	50672.5	68748.2	72212.9	53947.8	56911.2	207976	205622	206711	226546	89878.7	115211	76976.6	96513.1	108820	116792	118162	97082.3	93253.5	84249.8	145182	118045	161470	128871
Hisidine	133312	106615	155102	136004	131056	125267	123679	150806	76603.6	75320.6	87462.7	74422.1	79038.9	90945.6	149775	127644	129619	140987	104546	121752	151334	191412	196468	165742	93087.6	101650	103070	110150	203192	182048	75066.3	73352.1
Oxoadipic acid	56364.8	13150.9	97260.1	101987	111670	146582	204801	133814	48682.7	43330.6	32746.1	32590.8	35516.3	18926.6	298216	288488	554264	507212	73472.5	245111	8180.21	96788.3	33925.9	7703	76497.4	71649	42630.3	57301.4	42024.1	39153.5	53890.1	54744.8
Hydroxyoctanoic acid	231460	241701	198881	214641	202607	203611	176203	221804	163693	179715	195958	146790	225949	232680	632617	488065	486860	450790	257617	283530	149168	192192	104847	68190.3	319116	279168	189136	180197	85437.7	84466.4	184245	147087
Aminoadipic acid	64355.2	59403.6	166175	174597	94089.5	101790	197133	185541	62844.3	82188.2	50001.3	51481.8	46973.9	50668.7	92721.8	90066.9	260344	232584	56762.8	79016	55051.7	78194.7	37776.9	27700.9	45441.3	42010.9	35624.5	29277.2	65374.5	63119.6	35894.5	31244
Phenylalanine	2304676	2268890	2453448	2421655	2189832	2338760	2224830	2511927	1079629	1179503	1434370	1345620	1444627	1511901	1961816	1839170	2443507	2325749	1775792	2119839	2694151	3633572	2855517	2492648	1603032	1612221	2015799	1894166	2849570	2693925	1219309	1055260
Phenyllactic acid	51737.1	53430.9	83266.5	84206.4	59150.1	72899.9	51573.9	71226.6	53648.2	52072.8	62500.6	46325.6	73113.3	46856	97237.9	82106.1	115091	128316	61844.2	89860.6	142383	249916	82316.1	53486.8	54413.7	52972.9	42521.2	43573.9	113719	96389.8	86071.9	57189
Uric acid	1161725	1246213	1957930	2038406	1815099	2196390	3014789	2457494	1219855	1298880	548879	528547	2105405	1935980	1317722	1137016	528453	455296	453583	1079822	2117955	2943281	1739908	1281960	1915890	1962805	1282501	1304862	794095	793136	1349181	1459475
Methoxy-hydroxybenzoic acid	48592.3	96830.7	70082.4	71120.7	85246.7	113162	36890.7	65587.9	76887.8	59063.6	118584	107700	134072	76733.8	96168.7	88308	86753.5	94183.5	50664.3	62463.3	118399	226626	103027	107637	110271	105829	37730.8	37475.9	83795.3	149250	65992.6	81789
Diethylthiophosphate	640605	648982	456707	436985	509762	601050	660069	742957	476451	525397	503737	466724	653155	633128	463298	433915	457489	401192	501594	627517	446415	590757	278737	257703	540773	513873	402415	389973	47142.6	37444.2	245432	255223
DL-a-Glycerophosphate	92040.6	100024	343028	366839	138172	168560			119592	127413	93447.3	75265.6	235326	255005	141872	131828	40949.6	48334.9	53327.9	71975.7	47184.1	85998	82167.5	75455.6	156817	144366	68694.3	80658.3	27888.4	25466.7	89534	99003.8
Acetyl leucine	265240	277631	83283.2	83631.9	75571.5	78055.9	126808	120288	51751.2	48279.9	125536	126115	93031.2	95873.3	219630	191423	112553	127678	108826	173968	47380.3	64219.8	55332.9	31705.4	71151.2	68825.9	83115.8	66807.5	37528.5	43262.6	31416.3	39066.8
Aconitate	866707	756435	721930	640744	778163	901059	1099216	924543	633828	729308	713448	626834	493006	484878	857176	807782	688770	864982	790343	1625637	780897	1025344	429945	402141	367823	414092	458648	484111	265131	241201	687121	634558
Arginine	483194	463249	687368	610889	348644	379174	413742	432456	157092	175158	78111.5	66563.5	173027	204694	76528.8	91449.7	28183.3	36586.8	109063	152556		2448.86	68580.8	62190.9	77604	62285.3	13130.8	7286.47	2747.13	2133.07	19289.2	13213.9
N-Acetylaspartate	68028.3	49166	108165	92879.1	60887.1	83278.2	274551	146383	51946.9	65554.1	49932.1	60651.8	55912.9	51403.8	50214.6	38646.2	41191	79819.2	33848.4	79454.7	22441.1	42537.7	16495.8	11101.8	39442.2	47220.9	32366.2	47552.8	38149.4	36257.5	41945.9	39298.7
Citrulline	432332	409697	584109	616302	411991	523572	425606	526027	303258	332646	364005	351841	416718	430069	299190	292233	322316	315223	300759	381804	483393	642697	442915	385438	256038	258359	228926	207924	279677	284513	260688	233797
Serotonin	23585.4	29458.8	43746.7	33905.1	31210.1	36401.6	27170.8	28710	18212.6	17785.8	20198.6	21198.2	29718.4	19515.7	23138.7	11299.1	18141.3	14335.6	19556.1	21182.7	30798.6	43166.5	37944.7	25110.5	15410.9	8558.7	8204.99	7415.97	16589.1	11537.2	10171.4	12230
Gluconolactone	53510	52896.2	67291.4	66540.3	46885.4	68165.9	83226	102416	82846.5	81184.1	166206	145723	132139	120160	100843	75880.6	80570	174514	55159.3	69920.3	11678.6	5257.31	28186.4	24017.8	73476.4	84923.8	47435.9	58622.1	20550.4	32202.8	32374.6	25195.8
Glucose	16800000	17600000	20500000	18700000	17300000	16100000	26000000	38800000	22400000	23200000	15900000	14900000	18400000	17800000	7542662	8502418	6522800	5942820	10400000	9799129	5638114	10000000	6806654	5698726	10400000	10500000	15300000	14200000	2322329	2188479	9179088	8821804
Tyrosine	1119124	1140223	1294590	1174585	1191290	1138079	1778062	2467745	1455964	1676425	1135097	970630	1267817	1089522	509388	577698	419752	414230	666963	714275	409977	686654	448954	420860	702456	711409	990359	1006413	150847	134661	636306	592453
Hydroxyphenyllactic acid	46209.1	46615.2	51893.5	46645.9	44669.3	46632.5	58996.7	62019.9	46787.6	32664.6	16603.5	28592.1	26178.8	35187.7	102088	79334.9	90979.8	87023.2	37089.9	49022.7	94796.1	132157	62484.2	51130	35330.4	31868.8	39735.2	38294.9	85124.8	98739.5	54509.7	59731.9
Sorbitol	126043	144048	588159	573237	125501	108184	243530	344476	151199	188403	96313.3	91581.1	141536	109289	65651.9	80435.2	68341.5	143546	62029.2	56738.3	56860.6	85902.8	43624.8	51971.9	90666.4	82895.2	92594.2	75905.5	40550.4	32415	60896.3	38915.1
Pyridoxic acid	80169.8	95004.7	117876	101545	59323.8	76215	149156	128804	70863.6	64938.4	74197.7	81010.5	90157.7	75884.2	43587.3	29112.5	24277.3	99929.7	32771.9	51557.6	47132.3	67810.4	145042	144413	70682.1	65453.2	112647	87156.7	132240	127780	46681	41697.4
N-acetyl-glutamate	27697.9	30124.3	22240.3	29206.4	16738.8	29548.6	75571.8	33827.3	4955.18	5346.22	6621.44	10621	8718.23	13894.3	60305.7	46651.1	53405.5	68453.9	27197.4	85126.5	33702.4	43732.8	3429.23	3257.59	4534.12	11801.6	18003	12318.4	3630.53	4580.01	4711.13	12649.7
Citrate	503867	445281	594458	554378	534767	519560			378380	446586	369562	311479	340159	333067	694730	602775	374836	397496	417190		542467	728872	226452	210536	185353	209271	226886	212541	154192	127430	500250	406235
Phenylacetylglycine	330684	339982	122405	118470	66269.6	84172.2	106375	116441	95960.6	100106	147973	153438	157804	167168	253298	217637	80889.9	188164	98235	144186	141854	202716	92705.7	73273.9	311555	264938	167767	189429	323579	331151	176659	172150
Glucuronic acid	348794	339649	369444	373673	269278	317690	487096	499370	537026	600969	553889	539135	834554	836925	1044571	928040	814194	768690	313356	503121	939704	1370533	713909	604511	407747	337308	495020	528892	681342	627299	601753	567227
1 3-Dimethyluric acid	1876408	1705538	1738101	1730055	1190472	1445516	3536685	3368236	2343506	2575746	3297018	2958597	2998659	2865691	3763397	3266358	2692623	2788239	1246563	2647905	407623	534930	934387	754465	1480401	1394326	1637082	1616662	1018297	995084	985933	988040
Vanillylmandelic acid	118195	119598	125946	128471	118048	150271	158029	146404	102147	93545.7	96701.7	100343	111253	105584	153864	120310	155183	160737	105251	176868	126770	190842	86996.9	71771.3	101453	100630	110011	120059	86149.9	91336.5	91022.6	88857.3
N-octanoylglycine	173104	194337	110131	123223	85287.6	83247.5	57953.1	69855.6	39908.3	32172.1	89120.2	73677	56383.9	52722.1	317328	286506	293292	274359	163353	206026	96852.1	140999	43804.4	27676.2	49477.2	52660.7	45077.4	46514.9	36129.8	38313.6	24006.7	16454.6
Tryptophan	2789318	2833257	3365095	3429706	2792290	3064937	3584125	4222270	3242187	3321919	1781461	1727596	2379981	2296725	750667	731133	1015281	946251	1819960	2067389	2294754	3023002	2059998	1756903	1886995	1889040	2599351	2574531	1752802	1634868	1050772	920217
Indolelactic acid	90857.5	104722	124490	131839	66956.3	81930.1	81319.6	82949.3	91015.8	94837.7	69258.9	56428.3	60261.6	54595	134255	104265	123436	151775	88391.6	144954	316360	479130	395984	339596	177781	154355	124435	140988	493540	453544	213279	238871
Creatine Phosphate	45160	52930.3	6657.75	3616.03	66107.1	62541.6	78822.6	91725.6	59095.7	58188.3	53936.3	58860.9	29267	24640.6	71519.9	55747.5	14889.1	7204.09	23040.8	20857.6	10340.8	11708.2	43311.4	45297.7	24906	42272.2	38535.2	31862.9	6791.25	3489.28	59434.3	58797.3
Indoxyl sulfate	1587332	1654515	2788669	2583604	1364101	1139008	1288082	2064263	3389070	3605055	1565114	1128305	1821093	1630099	3408536	2530865	2983224	3420189	3899680	4206688	3676909	5733398	5691158	3911828	6015242	6115970	7546948	6162806	14600000	15500000	2951599	3100655
Pantothenate	32230.5	44191.3	62662.5	73511	78298.7	107253	41722.4	20369.2	100674	113902	8747.49	4361.98	87154.8	75924.3	69983.6	66788.9	56077	58865.5	10994.7	29171.4	78873.7	106924	57144	42657.5	80984.2	71456	137926	133382	71371.3	64687.7	32695.9	31032.3
Thymidine	172447	142571	150397	149620	162313	139969	135815	170202	145460	138140	123546	106680	221927	217868	479122	414457	414132	372608	290462	309718	202042	319439	164229	143810	268785	249499	416720	363127	82275	73970.7	152249	126155
Uridine	149819	149210	323336	285651	235491	271608	358779	383309	122356	153274	147166	121849	291928	273822	262772	260764	160276	196079	147805	210550	152087	222058	127132	96872.2	300369	282771	206042	201828	67559.5	51586.7	88725.2	103972
Nicotinamide riboside	1929634	1941615	1527825	1674670	1425992	1127253	1086551	1663855	1275928	1291590	977381	811761	1091369	1130856	937075	867800	783155	681672	872380	554115	1127434	1442430	228264	210185	591981	579956	689268	624440	119939	107814	423036	330255
Glycerophosphocholine	62203	71486.9	87333.8	89841.8	72312	70439.6	68363.5	84177.8	43497.3	58295.6	58289.4	49584.6	70233.2	54176.5	46897.1	46570	56547.6	48420.1	49835.8	47369	66715.5	101617	62894.7	51207.1	37320.7	42958.7	31605.8	37043.8	44096.4	41474.9	50845.1	40850
Glucose-6-phosphate	34453.9	33605.5	56170.1	51886.9	58973.2	53580.3	10569	7502.97	43263.4	42946.4	16010.1	9390.99	30204	29651.8	30880.8	39663	6163.87	3187.62	5439.23	7718.2	10140.8	17692.2	49223.6	37297.9	36394.2	39324.4	34914.1	34339.8	2591.89		42410.1	37119.1
Xanthosine	301804	345959	191020	157596	242041	213583	203693	399170	165816	164989	227342	209696	114776	134275	950264	1117853	514281	511678	169848	180378	901769	1497604	132086	77052.4	547049	657894	395398	370289	821536	798752	442202	218401
Stearic acid	14600000	15800000	17900000	17200000	15700000	15800000	15300000	22800000	16400000	16900000	17500000	20100000	11400000	13700000	30100000	27000000	30800000	29500000	24600000	32900000	16500000	19200000	16000000	14000000	26900000	32100000	24500000	24300000	12000000	11500000	17500000	18400000
Tetrahydrocortisone	120637	119590	502006	553645	471242	209078	467598	437730	322558	326707	156203	212775	109572	69432.2	410797	357563	280896	259741	387701	487134	128744	134448	173663	58560.8	183935	439926	309314	327267	12744.4	8169.85	107723	158561
