# Supplementary material for: Autophagy compensates for Lkb1 loss to maintain adult mice homeostasis and survival
Source: eLife journal article supplement (doi:10.7554/elife.62377), 2020-11-25
Supplement: supp [file elife-62377-supp-v1.zip › elife_poa_e62377_Source_data_2.xlsx]

## Sheet: Sheet1
Data Source. Table 2. Levels of metabolites in the intestine of mice measured by LC_MS
mouse strain	wild type control						Atg7-/-								Stk11 -/-								SAtg7 -/- ; Stk11 -/-
compoundId	Intestines_160_1	Intestines_160_2	Intestines_1341_2	Intestines_1342_1	Intestines_1342_2	Intestines_1357_1	Intestines_1357_1	Intestines_1357_2	Intestines_1542_1	Intestines_1542_2	Intestines_330_1	Intestines_330_2	Intestines_588_1	Intestines_588_2	Intestines_1301_1	Intestines_1301_2	Intestines_1303_1	Intestines_1303_2	Intestines_1304_1	Intestines_1304_2	Intestines_684_1	Intestines_684_2	Intestines_690_1	Intestines_690_2	Intestines_1213_1	Intestines_1213_2	Intestines_1221_1	Intestines_1221_2	Intestines_571_1	Intestines_571_2	Intestines_613_1	Intestines_613_2
Glycine	1027292	1023666	2577348	1847361	2056786	2632970	2632970	2325820	1983642	1746311	720653	768970	1196478	1062342	1181852	1353578	1833045	1950964	1722259	1764394	849957	959217	1330671	1349198	1979922	1259316	1368883	691551	1506434	1379066	1482557	1167391
Pyruvate	3967256	1940285	381256	860632	350403	5582004	5582004	4870256	683897	757874	4855624	2203473	9522813	3034995	1556307	2113672	999762	1270289	2396028	2156596	548574	693149	610590	486530	5389628	3072663	5840128	3569898	197121	271569	3570257	2879570
Alanine	38400000	30100000	44400000	22300000	29800000	43700000	43700000	39600000	35500000	26000000	35100000	45600000	48700000	45300000	26600000	38200000	36800000	36200000	32800000	28900000	16800000	25600000	33000000	32800000	47600000	28500000	48200000	19000000	26400000	24400000	32400000	25800000
Lactate	131000000	144000000	302000000	184000000	155000000	248000000	248000000	231000000	234000000	168000000	186000000	183000000	187000000	196000000	95900000	115000000	127000000	115000000	136000000	130000000	63400000	87900000	86500000	81700000	172000000	123000000	163000000	101000000	40200000	30600000	99600000	115000000
2-Oxobutanoate	262874	144142	190345	116789	134440	132473	132473	152667	302354	251706	137392	270895	399814	170623	156598	429003	222888	298681	249034	292985	136352	90035	207998	129232	407527	229892	329472	172412		197206	399094	159160
Dimethylglycine	84036.6	112085	160704	160254	135821	126730	126730	118836	84589.8	75051.9	112998	109362	107225	119200	394978	372053	723022	629759	155537	172613	83956.8	116968	65662.6	54211.8	128781	114951	133069	128293	103809	72930.9	109907	113415
4-Aminobutyrate	1569633	1673496	3873633	3070285	2872920	3111049	3111049	2567199	4461327	3532985	1308582	1861700	1702150	1677790	1510150	2114784	2899819	2798888	2515622	2532902	670364	895734	1449202	1447128	2160253	1324497	2235160	1079355	857272	838796	1087994	792134
Malonic acid	308381	549648	605184	490386	301812	305800	305800	258862	554330	512847	483809	234404	233980	160866	451593	735986	539222	603339	341366	593665	136326	164043	187675	177802	294263	196373	250084	151326	148885	154105	307471	241587
3-Hydroxybutyric acid	4534016	4025963	1581009	1486132	1284250	1150342	1150342	1062817	1967505	1741342	5108874	3955865	5264204	3570651	10000000	12300000	9900284	9106317	6670026	6608004	1168853	1420848	561664	514204	5858920	3792443	4781216	3013834	435937	371173	7928052	8306956
Serine	1803769	1900593	5952184	4050940	4143110	8405720	8405720		3502726	2609848	591952	558859	2882237	1117249	1133249	1205786	1768445	1690521	2476838	3875131	1116103	1571163	2960467	3386315	3004506	1784364	2414077	1056481	1240325	1229195	1520819	1269871
Glycerate	1105532	1370083	930160	529898	885457	402868	402868	362103	611431	561570	924843	515796	929623	731202	428810	1166204	757436	722199	761541	1029100	211942	378567	474070	541618	755592	426461	711354	362711	234564	397508	740540	964864
Uracil	13700000	9036070	10400000	5534982	5989272	13600000	13600000	12400000	7702142	5759350	3349499	3224084	5727670	3289451	4728848	6111880	6291348	6254070	5909500	5358586	4554794	4733130	9786437	9478332	11200000	9176833	9437490	5558022	2778161	2943507	883044	1039127
Creatinine	307788	242457	300337	231107	324413	474904	474904	564611	440557	504342	147206	293476	243917	239892	273962	350397	280089	279626	263409	173567	220216	206817	289298	305006	348658	302067	320496	192412	354877	330830	307849	299086
Proline	2500719	2458349	5545508	2983102	3428729	7715022	7715022		3245187	2405403	1175709	1105085	2334518	1575702	3180673	4162641	4612828	4057488	3795301	4312913	1449467	1986385	2659465	3008891	3564420	2413667	2413460	1289431	1526640	1165698	1559714	1390800
Maleic acid	1450388	3764189	1095572	3518400	1030052	2125576	2125576	1653931	1274132	1064926	3777702	1135648	1679805	1292011	1026780	1364664	1257655	1389750	1232040	4255570	571610	735712	1404394	1352612	1940626	1153224	1372828	765353	601096	687254	1592773	1211360
Fumarate	3707867	4350286	3184636	4807174	3192824	5376008	5376008	4522730	4177488	3024788	5102782	2822940	3935343	3080920	2239923	3123337	3004429	3220096	3161053	5240332	1032832	1458644	3356807	3218661	5246056	3345973	3660378	1839796	1255925	1263829	3508690	2395325
2-Ketoisovalerate	706415	810463	628851	494862	462288	1155107	1155107	797698	793537	650907	823956	734902	986290	783880	822608	1113317	832882	731935	1035754	1044514	504499	704695	176760	226652	346447	354080	514007	482510	565881	412631	810903	715734
Acetyl glycine	142122	200127	667496	433161	541645	269605	269605	207087	491150	451396	261433	249829	239930	234934	274797	434789	314244	301642	406354	313798	69185.1	103366	76963.7	65548.1	184201	139450	243845	117282	66001.4	84341.7	346242	268458
Valine	4289118	3673208	10300000	3585731	4392658	13000000	13000000	14600000	3501027	2763360	1547920	1685690	5196916	2005946	2044097	2271398	3956369	3373373	5136920	6744350	2439547	3058842	6085514	6485562	5463182	3362965	4175592	2053844	2704404	2308204	1464674	1378083
Succinate	87500000	71600000	134000000	67500000	89200000	119000000	119000000	102000000	99500000	90500000	78900000	90500000	99500000	84800000	70600000	95600000	97700000	82800000	97600000	79700000	58000000	67000000	88900000	84500000	104000000	84300000	103000000	56800000	58600000	49200000	58100000	56300000
2-Hydroxy-3-methylbutyric acid	2177172	2150642	2178959	758318	736142	397682	397682	345058	233956	218487	263644	304431	201644	132346	2474872	3894272	2629202	2665909	1715496	1165099	1065916	1213204	398513	363009	376372	227981	209358	116007	473997	346720	911792	848862
Threonine	1217262	1507573	5147366	2712488	2012366	5046806	5046806	5466608	1859666	1322930	622469	519852	1917440	886590	563069	580982	850726	798597	1326582	2712929	775815	1111835	2068150	2075837	1989673	1171603	1702210	806879	1164454	1109831	660657	504953
Cysteine	50339.2	26927.3	51834.2	36020.4	34801	43022.8	43022.8	67451.8	52491.6	25077.2	71700.1	21759.6	33881.8	49014.4	32251.9	27150.5	36725.6	37951	46936.2	60034.8	44011.1	18592.4	48998.1	60862.1	36768.3	30424	40958.6	42435.7	30152.7	49916.3	54084.8	42704.7
Taurine	270000000	253000000	252000000	201000000	186000000	206000000	206000000	202000000	289000000	255000000	215000000	241000000	259000000	267000000	187000000	251000000	232000000	231000000	233000000	186000000	156000000	206000000	253000000	253000000	251000000	198000000	237000000	156000000	298000000	296000000	305000000	286000000
Thymine	143956	155209	1200383	258699	158705	513111	513111	563752	245999	169704	161427	129773	490918	122157	309709	366444	318336	442221	455753	478182	531045	491776	97779.7	171390	42528.6	138599	126263	170938	99913.3	89503.3	122422	91945.2
Pyroglutamate	1762344	1738448	4126597	3340530	2951365	3241722	3241722	2884906	4670906	3735889	1343953	1962567	1797557	1720714	1601516	2141935	3045407	3108200	2859493	2680508	729743	930828	1628836	1515910	2226796	1500508	2427413	1188309	983066	903399	1154463	909739
Itaconic acid	460808	544921	5322758	2327687	7920514	1006746	1006746	977327	2196458	2685652	4175265	732736	3912557	968392	738405	1442063	950138	1018349	1055138	876462	368229	389939	351444	1610954	621944	460866	463466	466026	599701	539285	624670	3790226
Glutaconic acid	1227794	1047039	845405	824018	686270	997686	997686	995295	1554078	1073530	1005940	822210	1045164	875725	650604	1263938	1015001	1063826	1017436	1041612	431764	571070	673288	665164	1227560	746704	1096326	572366	581582	685259	952698	801568
Methyloxovaleric acid (Ketoleucine)	1190402	1841397	1846272	1251030	1132722	4313066	4313066	3046755	2193030	1963932	2585728	2729563	3938641	2028976	1753705	2216595	2098755	2140007	2789286	3955717	2084495	2680848	544839	586692	958644	1228947	1516466	1345902	687959	604692	2180478	2300659
N-Acetyl-L-alanine	105066	213272	622762	297294	348445	686180	686180	779715	132868	153069	70600.1	69606.4	74063	151027	284640	180685	262936	156300	210137	187977	151182	197833	250130	215997	139251	94898.5	115481	87924.2	301568	62820.2	82462.5	213640
Creatine	14200000	13800000	13300000	8278988	8935487	10600000	10600000	8899677	10400000	7775764	16600000	17600000	15400000	15700000	11800000	16700000	14300000	13600000	11700000	12100000	6624144	9739815	10600000	10700000	14800000	9835955	15900000	6605466	12200000	11100000	12900000	11900000
Leucine	6198298	5951418	17300000	5442496	6465446	18600000	18600000	22400000	3888828	3318737	2014927	1932509	7892276	2478319	3221381	3298942	6085124	4629660	9658905	13500000	3846492	4542800	10500000	12200000	7696626	4800217	6433270	3402672	3493274	2774816	1902214	2121613
Asparagine	910954	785201	3706510	2082779	2166923	8390091	8390091	8289486	1657307	1190499	468111	497102	2093585	672733	703960	681095	949223	1003708	1441179	1942168	587038	846231	1820167	1985404	3060763	1618197	2075465	1036707	555064	442826	1048009	716467
Leucic acid	577328	571229	947653	298140	417921	386654	386654	407226	269313	384568	94597.1	111718	163550	65760.8	1012495	1654695	1089001	788920	620488	493392	246992	299280	236084	315362	173927	153744	124258	57112.9	469965	137331	259660	190942
Ornithine	840717	979107	1823308	2036589	1731645	826700	826700	724847	2108727	1700522	552314	894855	826025	924822	950544	1166746	1463000	1607064	1563000	1396668	551771	651349	869388	808236	1177423	604863	554067	256517	738011	833407	1420493	833323
Aspartate	6254152	5396982	13400000	10500000	9825883	10100000	10100000	7937152	15000000	10900000	3926379	4358706	5896028	5173336	3995642	4937268	7916140	7513072	7892132	7731250	2026129	2757652	11500000	12100000	11600000	6268964	8475879	4060569	6520690	6913046	3985469	3038131
Malate	62700000	77700000	53400000	85700000	55200000	97600000	97600000	76600000	73200000	49600000	89300000	47500000	67700000	53100000	39500000	56300000	53200000	54200000	57300000	95900000	16000000	23900000	57900000	56100000	91500000	55600000	62800000	29600000	19300000	18300000	60300000	39400000
Homocysteine	59939.5	30045.6	122231	94442.3	68475.3	99054.2	99054.2	64527	122132	102687	29416.7	26525.5	56272.1	30734.2	39783.6	44179.1	59709.1	62152.1	74956.2	50542.2	13488.5	19831.8	102338	86128.4	90469.4	45396.1	71488.8	25470.5	51924.8	54168.7	30845.2	26587.5
Adenine	2802529	3642941	2493117	2261611	1718921	1286001	1286001	1045347	1954555	1614902	2759295	2695472	3128562	2455426	1198834	1851925	1119471	1228122	845640	1157171	851482	1178543	1861997	1872111	1651242	818861	2287479	1241921	2094015	2431585	1632521	1433808
Threonic acid	23300000	15600000	29400000	11600000	15900000	10300000	10300000	11900000	39700000	25600000	26600000	41000000	39300000	23700000	19100000	68900000	30000000	37200000	22300000	12200000	5494590	5653538	14100000	11200000	34400000	14800000	30900000	6499102	13400000	26400000	36200000	13300000
Hypoxanthine	5643106	4417926	1581332	1984713	2172426	2365925	2365925	2033161	2440818	2209718	3075611	2023551	1950679	2249461	1906709	2035845	1881260	3136137	1724556	1307635	1469147	1747244	3778977	2982662	3941885	2550520	2949205	1510678	1658706	2640414	1021433	1275277
m-aminobenzoic acid	301831	245757	80032.6	112714	113265	124624	124624	107584	139777	117529	159288	96355.5	112567	113690	114701	106585	103972	163432	91063.5	67786.8	89669.4	87721.7	212326	171830	231526	142910	154791	77680.2	93002.9	140547	57511	64928
Urocanic acid	234422	152027	321330	111693	173170	88768.2	88768.2	115629	398378	240137	268837	370769	397299	225073	180903	741855	286475	330865	244936	112719	41854.8	49735.6	168408	90371.5	295097	136268	290778	63133	123984	286519	387706	131121
1-Methylimidazole acetic acid	123326	275673	103142	6463.63	4636.74	60714.7	60714.7	53289.3	63369.5	80499.3	70507.8	48468.2	12507	17863.1	188583	269990	237009	122032	169251	141527	19492.4	43674.5	5565.14	3959.43	100603	30152.6	12658.3	4882.09	188639	70139	24565.7	47592.9
a-ketoglutarate	999018	1731358	490758	1420683		3338322	3338322	2528976	1161010	1117027		2643306	2811328	2311222	1272242	2033780	1363285	1160593	1908187		369510	545463	384219	348775	1732237	1044819	3040505	1383935	231535		1781066	1694660
Glutamine	4468560	4364124	14400000	12600000	9577033	9528101	9528101	8315982	11100000	10900000	4585516	6072462	7886922	6062404	6048466	7790892	10600000	11000000	7691342	8572696	3310876	4083749	3312013	3762434	5259134	3881097	7080894	4291408	7333248	6578190	4915676	3809558
Lysine	1566465	1332778	4268712	1219992	1423334	3824753	3824753	4175686	2074998	1505409	459168	537304	1598911	638393	977520	1165080	1753124	1499622	2109863	2462862	816381	925675	1744598	1862889	2051016	1374084	1596712	850091	1147105	1051786	649344	571410
Glutamate	39100000	41400000	93100000	76900000	71800000	75000000	75000000	64500000	106000000	84400000	31600000	44500000	43300000	39300000	37800000	49800000	68400000	68900000	64000000	65600000	17100000	21900000	35900000	35100000	53000000	34300000	54400000	26700000	21200000	20200000	27400000	21200000
2-Hydroxyglutarate	1421653	2932322	4347530	4643316	2192562	2687656	2687656	1898117	3668558	3031209	2955011	2172540	2024460	1957227	2861289	4240190	4695906	4941172	2708761	4728609	667386	1021101	668889	680777	1860014	1438859	2231927	1087836	1093402	1060906	1774148	1692049
Cinnamic acid	2244594	2324297	5290586	4360460	4134976	4223928	4223928	3700617	5994504	4716878	1844228	2419964	2430759	2234394	2246272	2790817	3930017	3890053	3557567	3643931	920635	1250815	2044897	1975508	2996426	2004748	3012824	1497325	1208615	1131887	1526610	1264533
Methionine	893258	913961	3280063	1252643	1427434	3924010	3924010	4455302	1088309	884523	391886	348710	1537907	609519	495256	487211	804653	590251	1198450	1529873	690327	865954	1504728	1603608	1345515	838109	977434	563111	584077	421080	241925	353154
Tartaric acid	124942	225226	112709	154182	184691	84561.6	84561.6	86328.8	61140.2	110982	153359	118129	82533.3	106883	89007.8	104076	191368	240643	206723	172848	133253	156235	129887	206832	186071	196475	124874	158920	240058	185920	125656	130150
D-Xylose	208305	153324	203701	284564	317043	226212	226212	177838	476175	488242	180080	199952	420132	282367	151075	251416	252587	286508	304690	203520	78179	90903.4	100018	88752.9	183200	127680	187438	114228	112654	138529	431065	366548
Guanine	41213.8	41290.6	155005	53874.7	65238.7	159157	159157	189147	52127	36851.7	13520.2	6447.84	69809.3	22700.7	15351.2	17219.2	35323	18736.3	46192.5	78057	21863	33235	60483.5	57045.9	67858.5	34213.3	45352.4	16243	19275.1	6362.25	3915.28	3638.92
Xanthine	7254180	7698598	5711138	4592660	5003130	7665260	7665260	6444852	4020508	4258114	8017132	4737465	4533660	5272776	3803329	4202794	4094921	5982144	3746134	3088593	3518999	3174905	7520276	5618968	5943676	4593104	5682620	3412651	3874928	5003068	2373954	3348181
Ribitol	220760	182023	339468	234655	268371	314078	314078	281016	311188	251309	191258	151278	228046	164287	167039	278432	234731	204477	200884	186605	85524.9	117658	222743	201422	305962	216886	265126	140271	166418	172743	292889	323483
3-Hydroxyanthranilic acid	364782	417754	328683	245374	251621	440186	440186	338803	199123	234615	440518	260332	246424	293790	209880	233799	205872	349965	228723	179698	199067	171559	411238	302823	323150	256226	313763	173510	212130	281344	131085	170474
FAPy-adenine	61388.5	10304.6	52620.4	3620.7	25208.4	11424.2	11424.2	15818.3	50578	64151.4	6700.73	79019	92595	53152.9	31108.6	89998.1	19893.2	59935.1	57048.3	3746.78	48080	17297.4	106996	49301.1	108427	65178.4	107925	39175.2	49576.1	132069	113543	28904.7
Hisidine	487056	388410	4771440	440620	1231892	1902527	1902527	1889048	1954299	971005	146547	188247	679055	153172	390417	691209	1036970	808757	1615441	981890	197756	270188	905188	1141830	1022799	482213	578279	152972	374836	435602	900446	313407
Isovalerylglycine	5975.34	25111.7	130519	44142.5	65526.4	107668	107668	119636	13152.4	33873	19679.2	50536.6	62487.8	33861.5	28789.7	49451.5	41356.5	24618.8	81906.5	29611.1	30850.8	13433	73479.3	65885.2	57389.3	38964.9	54245.8	19363.9	28613.8	30025.5	37103.3	81324
Hydroxyoctanoic acid	40126.3	78746.1	361681	288933	184403	41138.5	41138.5	35871.5	137190	128224	248964	216947	150566	223564	360607	418142	471645	435229	204872	198234	101780	84755.5	35256.8	42426.3	41581.6	65436.1	40938.3	39358.6	252820	142816	212142	198435
Aminoadipic acid	869097	884776	689630	412544	369928	262695	262695	219639	345122	273604	180562	134495	164360	137270	1858973	2720964	3744068	3466771	725771	668104	112908	163220	121173	133762	667804	456239	344816	225545	374506	358559	372332	307957
Methionine sulfoxide	54508.1	43265.2	84198.5	54501.6	46328.9	79308.1	79308.1	116455	60446.9	49893.9	26123.4	18361.1	54513.8	26161.8	40914.6	35275	54972.6	45247.4	61996.9	55832.6	36557.5	26094.1	43643	51188.8	35441.6	20707.4	28943.6	22137.8	16417.7	14068.4	17789.4	15375.3
Phenylalanine	5113414	4673896	9979333	3629861	4357892	12900000	12900000	15700000	3285423	2365160	1100323	1083217	5307182	1656053	2811868	3099638	4557544	3712016	6229738	8432888	2884910	3610158	7030658	7740684	6917350	4085448	4829854	2615055	3187592	2769907	1943722	2056835
Phenyllactic acid	86794.4	141040	829413	165898	206797	59103	59103	18155.7	214631	283411	52325.7	52331.7	67832.4	62288.7	296699	340971	682069	457377	233974	134423	76305.7	109544	19121.2	48287	19536.3	15920.5	26913	19667.4	335413	148459	57649.1	59444.1
Quinolinate	333649	242366	269678	163526	206734	230918	230918	204153	255384	264485	287554	143916	232572	114410	346085	1196498	428642	452594	350592	186904	112157	153626	291157	336543	405886	218720	440782	88438.4	216546	276540	336332	417271
Uric acid	1428711	2192980	4468252	3282054	2092020	4200564	4200564	3545778	1841942	1776773	2246553	1584784	1904392	1531500	914410	1166356	1506260	1222368	2051229	3506282	987761	1216897	2495575	2181475	1927284	1395177	1543680	821100	1113986	918691	707768	1040788
Methoxy-hydroxybenzoic acid	414095	455647	138856	179847	228377	315717	315717	319151	65132.5	117397	183115	172976	172258	133744	113572	127122	255142	258720	233329	261671	153618	182047	310272	322147	291145	242287	278263	198869	290650	200676	162389	151124
1-Methylhistidine	23171.9	32034.5	46930.8	31352.6	29865.4	36042.6	36042.6	33648.2	29166.7	23231.8	34131.1	35468.6	27294.3	30443.7	33221.3	46105.6	46975.6	42247.4	29531.1	26844.8	8818.29	12573.6	7614.8	7148.56	37950.8	26532.2	13328.2	7367.85	13572.5	7464.42	19917.8	16929.1
Dihydroxyacetone phosphate	134024	135290	200948	254098	133188	489761	489761	442159	274581	182311	384353	196127	225941	224528	139283	101941	123321	173552	132084	155494	33259.9	65809.8	96277.5	94041.3	208234	165408	132168	88788.6	69528.4	89129.6	208850	211026
DL-a-Glycerophosphate	5916620	5247296	10900000	5103020	5179618	14600000	14600000	13400000	9114433	6060994	15400000	11100000	17000000	10900000	2095056	2258172	2784166	2430816	5323942	5958212	1794274	2403901	5553120	5474650	8946411	6164278	11600000	6236954	2676577	2509739	5691782	7087150
Acetyl leucine	58779.2	78258.1	211341	158877	151634	222460	222460	240705	25422.3	71436.8	57555	134413	183238	52569.4	33713	42168.9	62085.8	21473.3	114035	135210	22150.3	37574.1	65793.4	101217	67664.3	24921.4	98833.4	54537.5	47235.8	7630.88	48386.3	117073
Theanine	28153.8	28799.5	80549.4	110802	92365.2	16662	16662	17805	120220	97072.1	29611.6	27918.1	28197.2	24995.6	13836.8	34592.6	19854.4	42892.1	50253.7	34865.1	5998.55	6144.45	28107.9	17798.4	47443.9	40861.2	31734.2	16359	5558.04	18487.6	18604.2	7462.26
Arginine	968528	1004605	2116359	736266	719996	2847333	2847333	3571587	759524	612878	198108	206659	1186682	378334	471608	584597	711022	590074	1076617	1536514	516830	648582	1125003	1012698	1612500	933356	990278	531421	459493	472976	279413	385288
N-Acetylaspartate	462646	959408	1744874	1971612	889315	946160	946160	633772	1630174	1293313	1420057	914557	1368672	952036	364064	833863	628302	645085	567003	875097	218212	260153	339866	327634	701935	405288	618451	254597	679499	812005	599741	415239
Citrulline	2027290	2225933	4130584	4825136	4178553	1957651	1957651	1716615	4872634	3845697	1344758	2232626	1991444	2240295	2208680	2741749	3453157	3614439	3715071	3353357	1304838	1643155	2108452	1817427	2678433	1732089	1279699	698786	1722255	1964722	3277658	2005668
Ascorbic acid	38300000	129000000	47800000	108000000	32700000	101000000	101000000	66300000	57300000	43400000	216000000	72500000	71000000	83200000	33500000	21000000	39600000	32900000	35700000	116000000	9071764	28300000	24900000	31800000	44400000	27800000	65000000	31300000	28600000	15100000	24000000	37900000
N-carbomoyl-L-aspartate	72876.5	70546.3	26819.1	37057.2	34759.7	9939.83	9939.83	13687.8	29873.8	33942	17416.3	15521.7	15521.1	5561.48	60179.6	78336.5	59570.6	64490.5	91985.4	133062	14149.9	10331.4	23888.5	17581.6	59062.9	41759.1	40280.9	19398.9	3748.35	8589.75	34175.9	38074
Serotonin	52240.7	52182.5	13085.7	4308.81	12495.8	14936	14936	13044.3	17859.7	8366.35	18038.8	18580.2	14081	12420.9	23136.1	40528.3	35958.3	41155.6	34550	20772.9	32066	48400.8	82301.4	79072.9	100964	66275.4	108443	53034.5	58889.3	51445.3	50827.1	44511
Gluconolactone	302512	184403	229311	190246	189409	177001	177001	222270	419495	339259	218594	349279	375478	260547	224789	646238	311502	450530	283553	175822	182733	119847	297076	216772	534471	311284	415096	251900	168581	287002	376967	139679
Inositol	2524054	3209218	9107845	6102940	4816302	2527965	2527965	2314152	5763142	5253890	3160175	3720843	4100053	3345255	2630512	4631612	4111107	4152507	3880738	3690620	1608172	2166135	2224063	2149136	2699042	1827692	1821274	982271	4612310	5497184	3625151	2516995
Tyrosine	1463775	1370878	3828286	1818330	2004625	5696948	5696948	6384318	1336912	1079843	361230	332743	2076428	597290	856923	960634	1532946	1241069	2119701	2848205	1104648	1463920	2019998	2113330	2613686	1441463	1742062	940147	843796	638372	588646	640279
Hydroxyphenyllactic acid	54261.7	275083	1870305	317489	407961	198766	198766	212598	92439.7	139606	40322.2	18353.5	137617	151085	231153	164657	543909	177835	295920	186146	77566	172042	60827.9	108999	53848.5	27685.7	46092	34262.2	275052	104499	48532.2	207364
Pyridoxic acid	86436.7	141348	88389.2	36427.3	70470.9	140979	140979	200806	103612	133106	7668.86	61407.1	29478.2	14432.9	31684.9	122216	84113.5	35915	71759.5	56613.8	22750	34687.8	100631	51570	27353.3	20808	61231.6	29133.8	232793	169548	156183	249553
N-acetyl-glutamate	556841	1276852	793704	2423555	1006061	1237266	1237266	1041980	1121076	896423	1575923	706226	585446	513002	532392	856636	956655	1017177	629652	1523864	186190	226693	551092	452262	824179	455843	754093	417475	142432	117325	208193	196135
Acetyl-Methionine	56287.2	215070	542029	148009	170128	526178	526178	637332	59501.1	72099.2	55336.6	39362.8	107435	65254.2	67494.5	52481.9	130857	61363.4	120238	185632	29466.6	88654.6	102186	172092	83377.4	53446.9	68215.3	58105.6	65331.6	28467.1	35214.5	107859
Citrate	485474	825808	711055	1461800	469958	242763	242763	186707	990939	685680	969995	660543	589375	477526	486038	996141	648831	681093	526085	1125282	183220	294908	186759	158904	516145	362464	551980	205891	208015	282450	1411804	837838
Phenylacetylglycine	37975.7	86539.9	311482	153741	269398	390641	390641	468263	84336.9	230140	97405.7	273443	126501	72372.3	109789	110558	88262.1	45843.3	178124	118715	56304.2	124631	277910	267699	357841	130410	238970	83454.8	248446	138107	111574	788646
Galacturonic acid	2855089	3376691	1460436	3697415	4518606	4752640	4752640	6590794	1444666	1909818	2372616	1329551	2293034	1495988	1405524	6144082	1472953	903248	1724813	1301625	763554	840144	2199491	1867142	4188902	2263307	3412497	1325916	530233	510048	3414563	4211362
Syringic acid	249954	67634.1	128687	108825	92192	83085.4	83085.4	86688.7	383810	301323	72638	126698	122526	71692.7	78449.7	223151	82475.6	138356	83300.4	81979.3	64561.4	43771.6	123744	57784.6	255406	167460	146309	54212.1	70296.3	146311	145507	25141.7
Tryptophan	1293723	1064724	3513137	1294146	1582925	5931600	5931600	6291304	1992201	1583090	467802	488157	1828887	507492	814352	888551	1138957	875391	1653692	2140189	747106	901484	1477707	1552014	2407547	1372513	1377078	757525	561107	531543	687482	561906
Acetyl-Phenylalanine	68162.2	170415	187313	65492.8	100175	393039	393039	420579	10793.1	13265.3	17279.9	3133.45	74290.9	17542.3	67614.7	55945.5	97429.6	8240.76	113212	224801	25912.5	78939.6	283042	391821	163894	52105.6	147316	50282.3	70342.1	18144.8	21349.5	41336.1
Kynurenine	19087.4	23763.8	54262.6	35214.8	23344.8	33317.5	33317.5	37315.1	60925.1	50053.8	13996.3	17415.8	15392.7	14770.9	66677.3	87146.4	98457.3	92848.8	64784.2	63250.4	9501.9	12269.6	30114.2	30271	61574.8	37699.5	56559.8	23834.6	80044.6	75583.4	93601	93205.8
Creatine Phosphate	767460	715225	1113277	1291769	257699	389242	389242	230618	1147016	803774	1334424	1882813	643685	1020607	1021521	1974404	1875478	863042	1207275	1267952	423627	426434	611336	514992	531362	431048	700639	795733	1194064	929713	3566395	2879672
Indoxyl sulfate	608132	476114	286666	194834	233924	513275	513275	589881	416769	452837	67900.7	402606	266010	177600	394119	455340	409807	295740	433132	345047	318610	366770	242866	285015	379888	324436	514450	284913	487528	1055874	359540	462235
Pantothenate	167385	427203	643886	565444	383307	332227	332227	375890	271009	261927	110407	49081.5	322981	226393	251503	279984	402116	216712	155929	217261	158513	258528	160186	261737	192228	132247	227381	178440	410558	275804	127673	224186
Cystathionine	158459	173606		31921.7	10523.8	12659.5	12659.5	16647.2	12630.7	18152.5		18147.6	9700.89	10939	140804	185539	217745	9785.39	9266.37	78985.2	127562	13268.3	127689	117769	6239.1	62139.6	8231.86	74473	88274.6	78799.3	57436.1	46246.8
Ribose phosphate	387897	412955	608995	467313	541228	557707	557707	502336	552705	442335	746376	529674	578605	573612	268205	290954	311526	362377	256391	252321	184683	236040	386524	349781	448424	342447	366809	216631	318360	422363	232136	292381
Melatonin	98223.8	62847.4	5700.23	12950	9472.27	126140	126140	98080.1	16280	19463.3	24930.8	5465.01	22560.3	7766.51	4596.32	5261.15		6765.34	39468.3	70074.6	82233.7	140168	119235	152613	55606.4	79618.7	189363	110250	27672.5	4564.66	17805.4	40496.1
Cystine	127762	113598	167430	115696	111067	180260	180260	153484	162116	163101	123158	165501	163238	138475	98032	121110	98029	124740	121284	105860	79789.6	86870.2	90861.5	75632.4	132053	126101	143417	92369	38478.6	39129.1	105249	110301
Cytidine	15100000	13700000	19400000	11500000	12200000	15000000	15000000	13000000	21700000	14200000	10400000	12900000	12600000	14000000	3854730	5862734	5587884	4386664	11000000	11200000	5590304	8308626	14400000	13800000	12900000	8433248	19500000	9549365	8858484	7870198	13100000	13500000
Uridine	5593812	5830632	4503756	3319434	3071730	3794043	3794043	3071427	2126844	1976454	1824793	1749020	2307736	2197137	2803444	2816574	3210935	3784583	2631892	2496653	3024818	3155403	4888598	4599414	4286056	2836444	3510881	2175733	2312825	2161931	1233495	1800534
Biotin	1141204	1041906	1507189	868140	906047	1137630	1137630	1038225	1667130	1110815	821119	968968	965591	1025304	280240	468038	382498	335065	824977	847337	419186	615939	1149388	1077413	1025945	668671	1507038	731968	657870	616072	1031577	1027814
Pyridoxal 5-phosphate	925401	657742	1510218	975715	1204625	2053102	2053102	1932892	1242847	1168467	748050	903737	1354749	1268931	652013	685893	933409	924490	980428	873511	575607	725612	1134476	1239038	1386042	978607	1217258	782364	435341	423876	651127	455970
Deoxyinosine	84300.8	77768.4	43205.9	57280.9	51320.7	84909.4	84909.4	91770.2	108109	82268.7	7081.54	9519.85	35986.9	2846.81	59800.4	76842.6	57919.6	76621.7	70835.9	73295.8	9638.8	23830.8	28534.8	28312.9	98049.6	68860.7	91451.5	59865.1	24735	34346.8	8329.56	11170.6
Glycerophosphocholine	247797	234118	272878	299639	310845	228437	228437	187467	331869	266322	107059	203748	228673	231064	270263	307181	377816	373669	377096	275678	181285	211555	251413	249481	291063	199303	188985	85283.3	210671	234985	272742	195225
D-glucosamine-1/6-phosphate	101722	91909.2	256109	163335	205460	178899	178899	125472	202988	149366	76672.1	103348	86243.6	76718.2	148564	226197	328407	284828	102926	100279	37681	48152.4	87040.9	91135.5	122164	77353.5	80475.4	38015.9	48429.1	54973.1	100823	62531.1
Glucose-6-phosphate	262698	263276	411547	319380	385397	470418	470418	291727	444636	287499	585359	392113	555669	450332	159798	308202	221484	190420	189186	228429	46529.6	72247.7	85052.5	90017.3	187583	117106	225575	147266	51275.9	52762.3	314645	274506
Fructose-6-phosphate	214720	268765	284148	296031	184494	216564	216564	190193	378512	248470	306518	248993	320218	260789	116958	159854	141810	170889	247948	223349	63660.9	106755	199204	164272	183868	133012	153566	74023.7	116064	170326	274174	219775
Thiamine	382775	738422	359994	180407	183479	260740	260740	226338	188001	103585	188836	126700	109955	95580.5	28674.4	89954	78993.8	46577.9	88064.2	162942	31358	66593.4	276117	352096	160694	93572.9	141608	81526	132286	114746	160254	232365
Adenosine	1168030	1507952	1041761	769886	725043	469586	469586	349255	572899	522248	1111654	1092211	1367764	1004738	444405	784970	421248	438137	247654	256886	288657	482360	718953	791261	625147	298345	911252	480353	926847	1024576	618198	525929
Inosine	5483878	5197859	3643684	3478650	3412082	2765389	2765389	1859358	3095415	3244998	3467686	2843294	3333683	3461098	2711954	2496914	2455874	4056377	2108769	1799840	2334692	2994810	4784294	3864633	4877222	3052379	5005666	2733492	2702885	3884263	1517855	1988991
6-Phosphogluconate	81537	55468.8	120011	56058.7	71234.8	117447	117447	98936.2	81721.5	65168	70206.6	89345.7	88782.1	88100.8	60168.9	84403.6	74944.2	71486.3	74968.4	63250.5	48945.4	55632.2	86308.8	67201.1	96548.5	72385.4	83419.7	44777.4	44083.4	30869.6	37979.9	50326.8
Guanosine	1272826	1410470	464320	405249	493002	421334	421334	316924	474740	379169	708894	593687	685595	517934	366934	574282	335928	350768	271239	244553	268506	376644	647988	567084	632928	363417	919239	476659	297971	340337	333264	406655
Xanthosine	2029410	2233133	862492	589191	650736	1004220	1004220	788850	898423	569673	723207	834650	910399	660694	502674	857027	870782	836967	852850	1160071	796696	1195858	2395121	2358791	1616672	1076325	1765928	652798	1768066	1679779	3242935	3853144
Stearic acid	16900000	15100000	26400000	19900000	28500000	11800000	11800000	14200000	21000000	18300000	12900000	8811522	12500000	9959841	12000000	24300000	15100000	16700000	15100000	15000000	10200000	12200000	11900000	12200000	18400000	15900000	10000000	9392808	9832548	8871848	12900000	16500000
L-arginino-succinate	32259.4	33159.1	71285.3	40256.6	38684.3	94711.1	94711.1	92563.1	61010.3	33016	11006.9	4129.61	33751	14673.4	46130.2	68620.7	59685.4	58970.3	55103.1	68707.4	20456.1	16752.2	36484.4	37372.4	65459.8	37281.8	40391.7	18177.8	7431.85	13702.8	22503.8	10066.6
5- Methylthioadenosine	20628.3	25519.7	90582.6	40937.8	96399.9	12653	12653		140184	75114.4	58263.5	99201.5	61401.4	82227.2	39845.6	80468.2	90378.8	138274	98200.9	30778.4	69331.6	43782.7	38576.6	72303.1	20286	27808.1	44716.6	14561.8	65196.1	120779	84755	52960.5
dCMP	11200000	10400000	7713278	7145080	5104966	7154756	7154756	5654244	3002102	4916163	3405921	4241480	5610710	3823634	5880032	8250326	5448744	9324123	4902992	5109244	7062174	5675098	12100000	8273798	11000000	7816278	8788120	4192309	4649851	6058732	3830815	3719503
Glutathione	30500000	35300000	32000000	43000000	22000000	46200000	46200000	35000000	38500000	27000000	36500000	24500000	23900000	27200000	22300000	16600000	33700000	22600000	29500000	39100000	13100000	23400000	28400000	29800000	36100000	26900000	41600000	22800000	23400000	14600000	15300000	25100000
CMP	513297	534246	626063	515460	647658	409812	409812	443513	805035	574025	510262	389616	437575	427018	440622	675673	548422	685035	438599	431072	219696	371138	422654	396764	559184	410702	577743	241195	497184	598976	607419	487563
UMP	3938781	4264756	4145275	3139674	3938829	2543003	2543003	2745116	4749412	3322423	3713133	3162727	3510031	3258505	3100984	3957447	3550879	4181386	2931767	3028395	1617232	2968791	2922852	2996683	4197262	2959969	4304512	1836586	3066616	3258606	2963562	2749551
Cyclic AMP	9871	13813.1	36400.5	25596.9	17244.2	20504	20504	16853.7	41561.9	19814.2	38473.2	46839.8	44146.5	36612.5	8973.02	20600.4	14102.2	14633.9	16957.1	12332.6	3862.07	9276.54	7646.79	16772.4	21399.6	11294.7	15430.8	12740.7	20244.7	13313	18068.5	31626.3
dAMP	2528134	1690589	982938	1267618	997804	895144	895144	557151	1039210	1614818	1218307	1701516	1918446	981983	1085698	1553132	756339	2306054	730761	636315	1282174	1073132	2556727	1103858	2673289	1901327	2796140	971206	938992	2229055	1055757	785308
Nicotinamide ribotide	300030	389110	769934	672379	691262	487125	487125	405379	368672	235525	459272	235996	292868	304836	250610	336342	387264	325956	260735	296279	100064	147563	235821	270929	438454	259329	430414	215724	158779	153092	159022	152053
5-Aminoimidazole-4-carboxamide ribonucleotide	230715	203125	402393	780165	535933	365444	365444	209757	757376	731384	320993	360545	1012693	543533	159986	196676	264786	384609	269664	332842	58694.8	115715	94061.6	77149.9	167858	124926	167048	124373	70313.9	67670.2	950181	975382
AMP	11100000	12700000	23400000	15400000	17400000	15500000	15500000	15100000	16600000	14000000	16900000	14500000	15300000	14300000	8394653	11400000	11800000	12300000	10200000	11200000	4601554	7423030	12800000	13100000	14800000	10400000	14800000	6988782	11100000	12100000	7844342	6867542
GMP	1241725	1469157	2468987	1659426	2167593	1874390	1874390	1927819	2308427	1686761	1856151	1555998	1601430	1593299	1017638	1229637	1261150	1490075	1166309	1264653	654086	991816	1505111	1574067	1710057	1340109	1752318	793770	1192507	1412648	921931	885222
CDP	294162	237412	417318	322806	372245	336140	336140	366530	411413	393393	179218	285906	284495	292776	277832	277393	358607	378091	346296	283305	147218	186185	253020	257644	316550	278768	325803	221992	173371	203390	234767	165584
UDP	270616	175577	397771	189713	270082	346550	346550	303206	502590	327187	230694	396762	456266	454918	237652	376897	323672	224855	297002	292630	119347	187707	177603	188187	370928	268010	419792	237580	166362	140682	411283	325592
Cholic acid	90010.6	105745	13800000	5086280	10000000	697726	697726	1077628	4919360	6941000	9636.55	52537.6	16100000	11700000	81218.1	181524	1197352	547425	2877481	4464492	54725.7	89051.8	1404360	1294394	4404390	2434538	126779	40735.6	11600000	1510133	29600000	44000000
Thiamine pyrophosphate	14155.8	11195.8	35834.4	22372.2	12009.1	18090.8	18090.8	13007	43271.9	17526.2	11454.9	23768.8	12550.7	19053.2	4185.05	14278.3	14760.3	8739.08	19539.6	29807	4829.83	13592.5	30695.4	19985.2	15121.9	3250.46	10960.5	2910.06	19620.6	23644.5	39192	34689.6
ADP	682480	582112	2947623	1552748	1649825	1187010	1187010	900339	3912651	2623624	1463256	1845070	2076812	2343798	857463	1222016	1543472	1101136	1084393	1986848	526362	958129	896562	793347	968797	852150	987657	671546	1405042	1535280	2022310	1626116
Deoxycholylglycine	16446.5	22923.3	109687	49533.6	58552.5	44224.7	44224.7	64532.7	111939	225875			91530.8	29339.1	64051.9	107653	137948	57737.5	110276	179888	20041	56920.4	23212.6	75127.8	152689	146507	183475	66191.3	4610.09	5695.23	3473.98	21131.2
Cholesteryl sulfate	2993460	5413588	2648731	2459947	3567127	2673922	2673922	2975572	480610	2236190	3779570	4729206	4038411	4870806	2420439	2556843	1380961	797404	3865499	3871797	4262224	5452946	3893398	3811633	2635192	2289584	2471212	2258713	2837136	2593448	5753258	9468200
CDP-choline	130752	153334	186051	184531	138352	169577	169577	153119	204299	137541	189978	132163	164510	137758	63090.3	88033.9	85615.4	76497.2	95833.1	113201	59144	80124.1	111348	108496	145592	90285	168520	80719.8	113456	100299	41272.6	53550.4
ATP	78429.5	60909.8	275755	173560	51815	131262	131262	75146.9	539573	229997	254463	295157	250252	362049	94039.6	127041	228049	78266.7	112624	337875	61266.5	92486	69799.3	89982.1	47530	33263.4	52483.6	94154.4	180983	113693	574948	411118
GTP	319656	327929	257874	324429	279884	283649	283649	286705	341406	305130	350290	324006	303031	281686	301342	292702	304891	294404	311052	335844	261146	289415	302477	326428	311528	270474	335108	256356	297614	318468	312768	290220
cADP-Ribose	244220	218237	291279	194075	133167	197306	197306	130699	264915	190891	292020	260045	262201	237737	110791	162237	189137	107592	187560	240238	124980	156475	226350	220401	254210	143270	291055	186682	143239	141700	227422	227528
UDP-D-Glucose	921127	989267	1312875	1188424	1029001	1054212	1054212	962308	1723286	1065213	1043590	1099224	1168115	1184424	851859	1123846	1094505	964271	1036820	1067755	462095	680383	822804	870783	1088486	789548	1253846	696935	790261	904600	1150533	999824
ADP-D-Glucose	128882	160432	244176	187964	163114	225472	225472	216627	299664	173183	233158	220480	215440	216743	107860	177529	165560	144542	152767	168402	68209.8	111870	150917	151487	174258	125172	274852	155563	194429	170506	233324	238100
Hematoporphyrin	1503100	1197929	531735	643442	1129797	1716921	1716921	1758624	1260143	1600715	2647.3	43054.2	1709055	438277	414194	565473	338776	155706	430567	644333	305000	533398	2327547	2437475	2641954	1763848	2250037	1770057	391679	599713	93407.4	83971.2
UDP-N-acetyl-glucosamine	1602830	1962306	1939629	1879671	1603008	1664682	1664682	1475534	2468104	1660856	2419153	1884823	1949736	2039473	1508755	2097811	2199297	1838583	1749970	2029203	1064269	1438207	1936477	1917608	1883260	1331544	2303075	1146560	2072108	1748594	2542633	2608066
Glutathione disulfide	323193	347350	1965826	877198	1483311	284224	284224	336278	2262133	1447444	812684	1223569	1249821	930008	529899	1582966	1046925	1299853	896518	478359	211728	126099	380640	243032	825993	507386	823114	285817	670334	1120712	1189204	398248
NAD+	1230343	956503	1469602	815345	720081	1033452	1033452	662675	1364414	986285	1081150	1233366	1369393	1257636	562887	777322	846265	501688	967245	1153998	649305	822420	1043608	1138580	1342416	809444	1445268	925069	741092	690935	1136596	1176359
NADH	70941.1	54388.7	77014.4	48485.2	38736.5	72248.2	72248.2	41650.4	77995.8	52688.2	61555.2	75752.9	75773.9	70844.1	29699.9	49902.1	52223	35499.6	48748.3	64642.4	39174	47479.3	56726.9	67041	73489.9	45874.4	88894.2	55557.1	48394.6	38329.9	62086.8	72381.5
NADP+	27079.4	20489.5	47811.8	24685.5	46724.3	47595.2	47595.2	26971.3	60818.7	36419.9	32774.1	33551	43742.1	39802.9	15912.7	33052.4	27872.5	19875.8	39679.5	41427.8	25115	27880.9	47988.5	40704	43947.3	34822.2	35539.1	21631.4	20859.8	24086.4	40346.6	26083
NADPH	150732	104532	177354	123812	99251.5	149472	149472	89477.5	178033	122574	136518	169370	161997	169807	89627.3	112519	115737	73038.3	124302	137795	100435	114926	140639	132120	171419	96448.9	172180	119944	105388	73132	143003	160335
Coenzyme A	15677.4	40421.9	23532.2	45568	17802.7	18158.2	18158.2	20224.7	21612.1	19269.8	74340.7	28243	19225.5	29161	6947.41	4044.93	9705.94	6874.85	6256.3	43380.9	5882.99	10563.6	24661.2	24223.3	27758.6	20485.1	23977.8	15032.3	6461.29	18443.8	10720.6	7971.69
FAD	37896.2	45051.9	54056.3	28273.4	33021.7	41447.7	41447.7	26549.8	33100.7	24220.4	51506.3	38313.3	48474.8	56611.5		22261.9	37305.5	30162.3	26742.5	41136.8	21189.7	31058.3	53586.7	40474.4	38135.9	39677.5	46326.1	27507.1	31113.2	39018.6	35460.5	46123.6
