# Supplementary figures and images for: Autophagy compensates for Lkb1 loss to maintain adult mice homeostasis and survival
Source: eLife journal article supplement (doi:10.7554/elife.62377), 2020-11-25

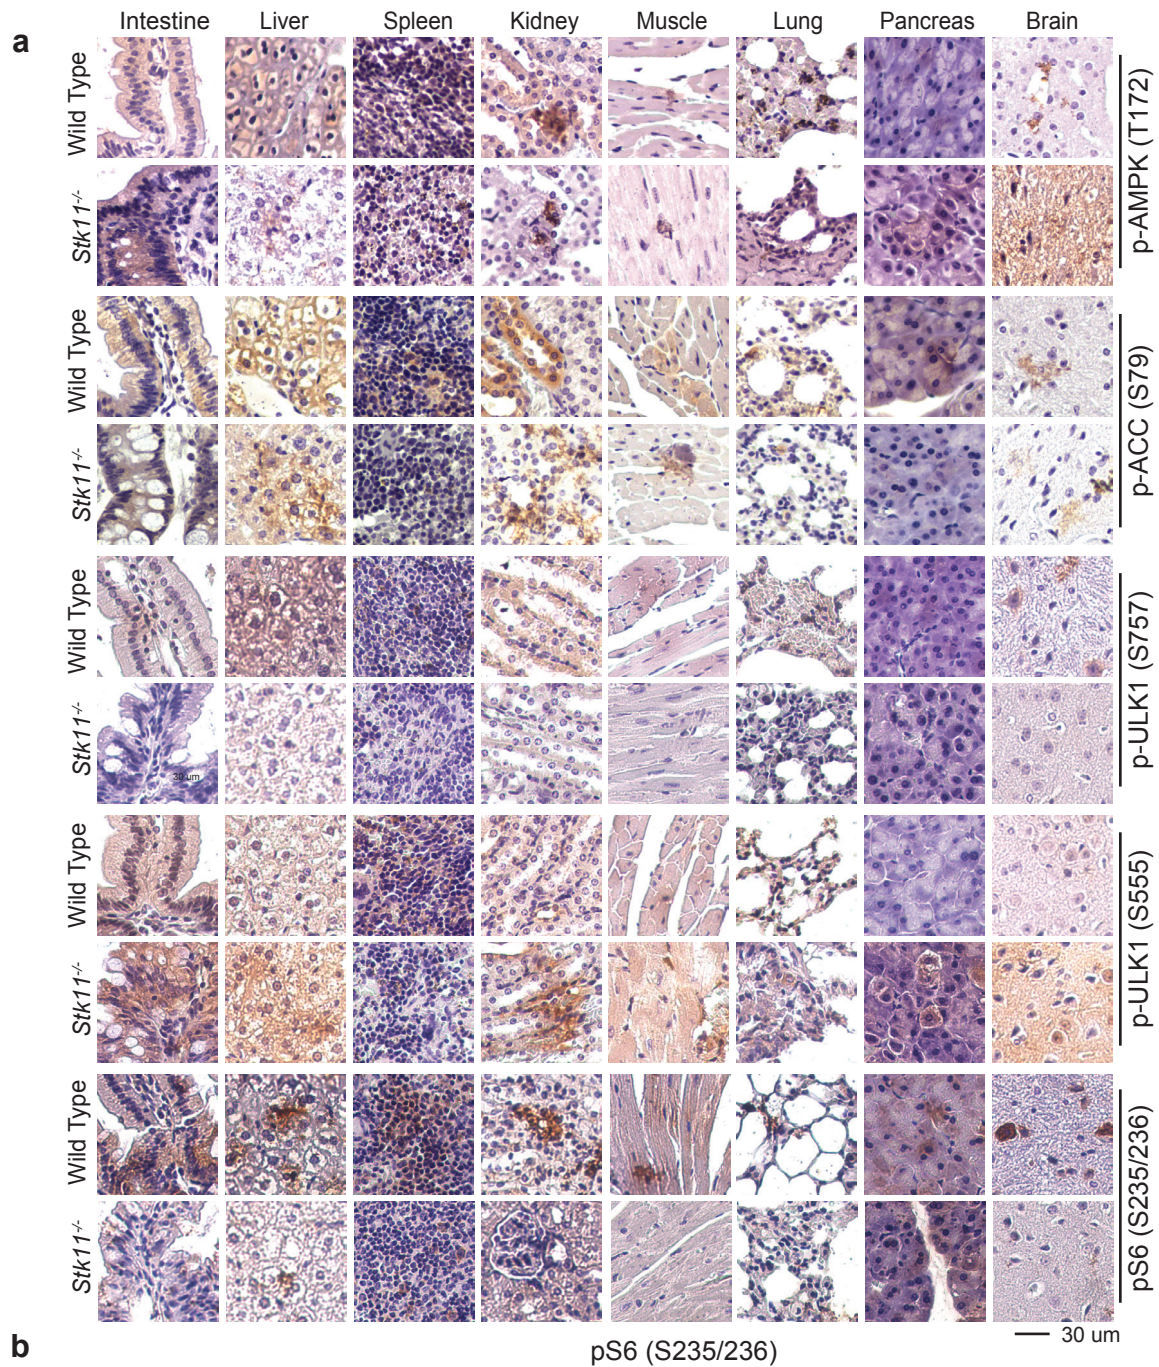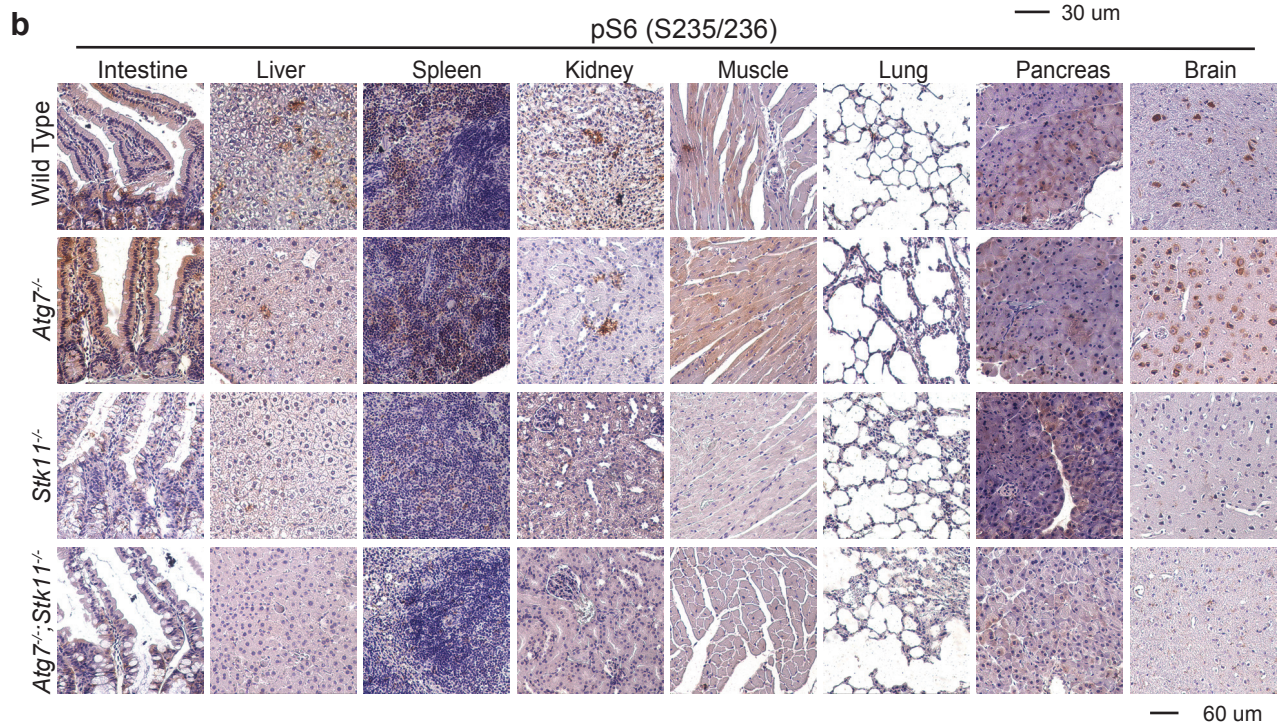

Supplement: supp [file elife-62377-supp-v1.zip › elife_poa_e62377_Figure_1_figure_supplement_1.pdf]

Figure 2-figure supplement 1

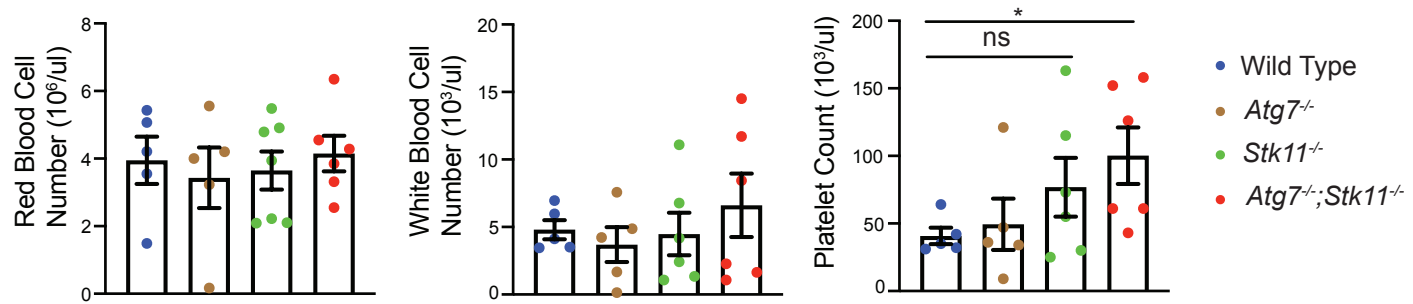

Supplement: supp [file elife-62377-supp-v1.zip › elife_poa_e62377_Figure_2_figure_supplement_1.pdf]

**a**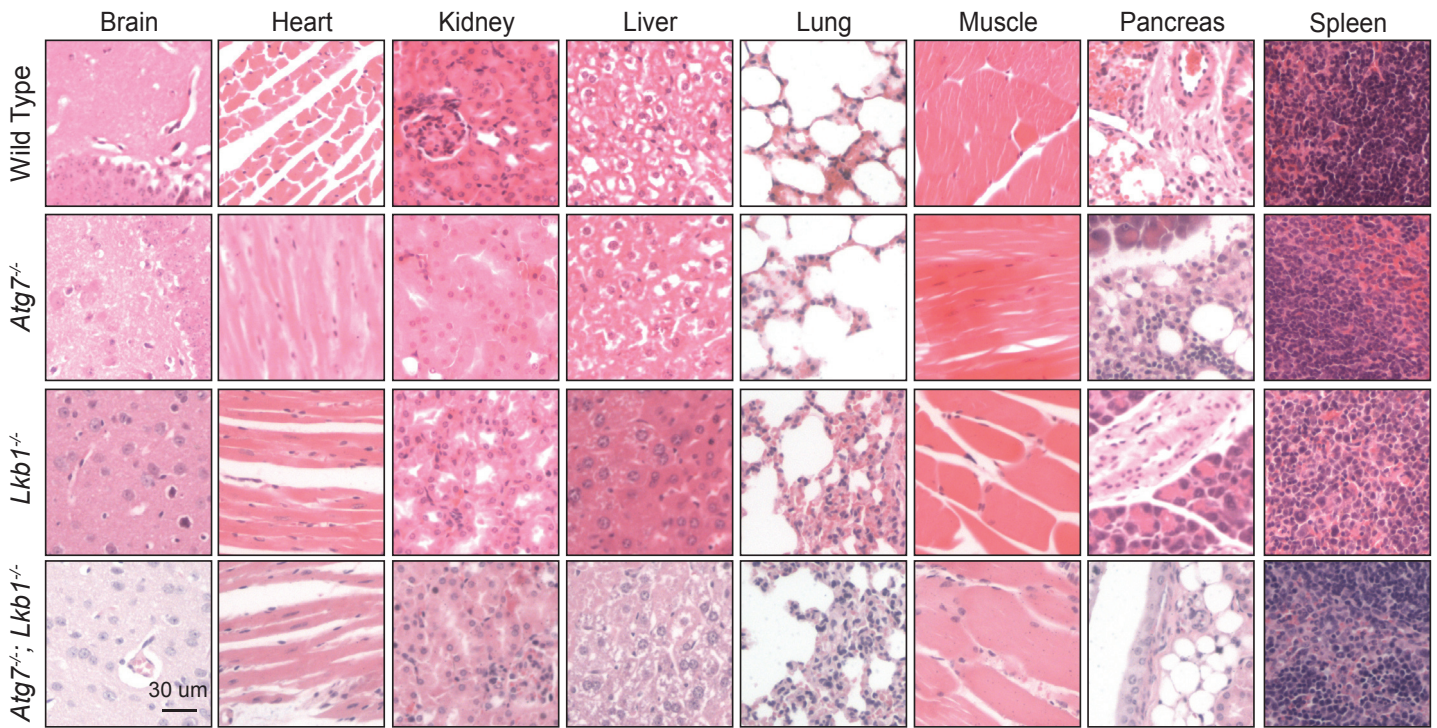**b**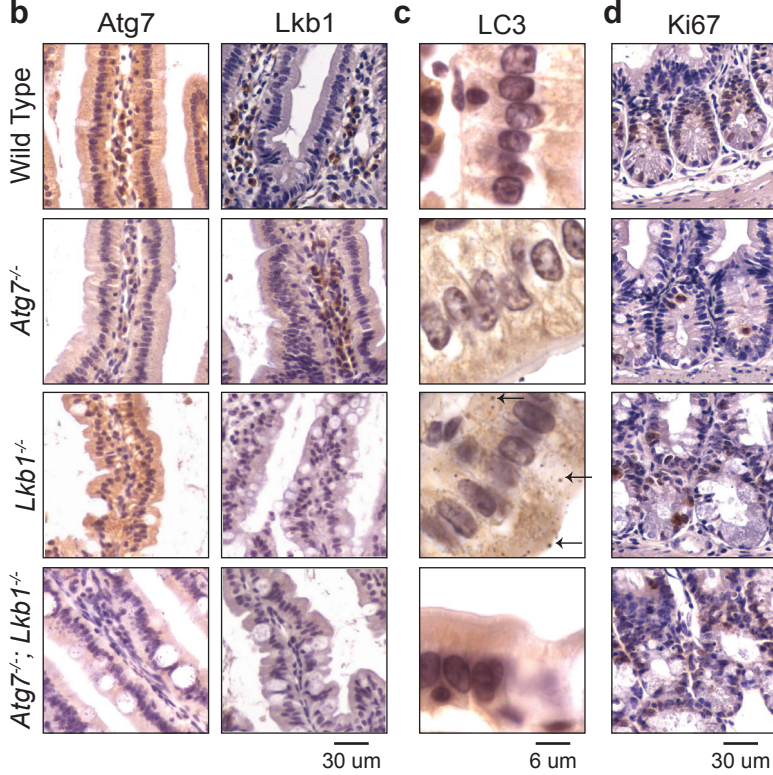**c**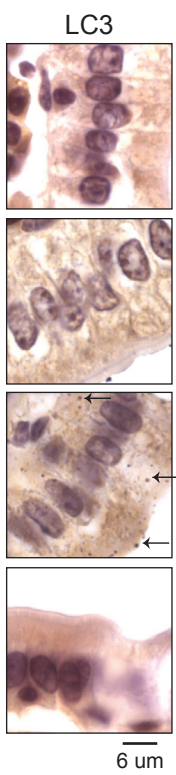**d**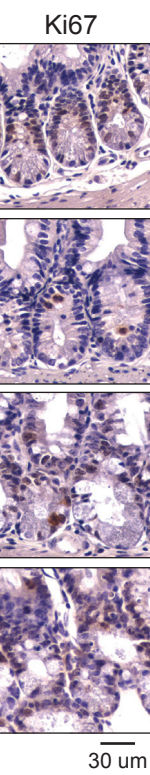**e**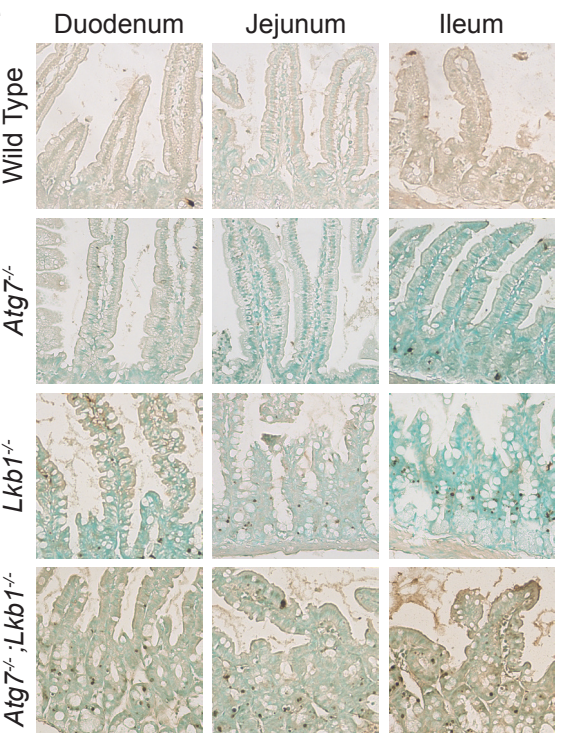

Supplement: supp [file elife-62377-supp-v1.zip › elife_poa_e62377_Figure_3_figure_supplement_1.pdf]

Figure 4-figure supplement 1

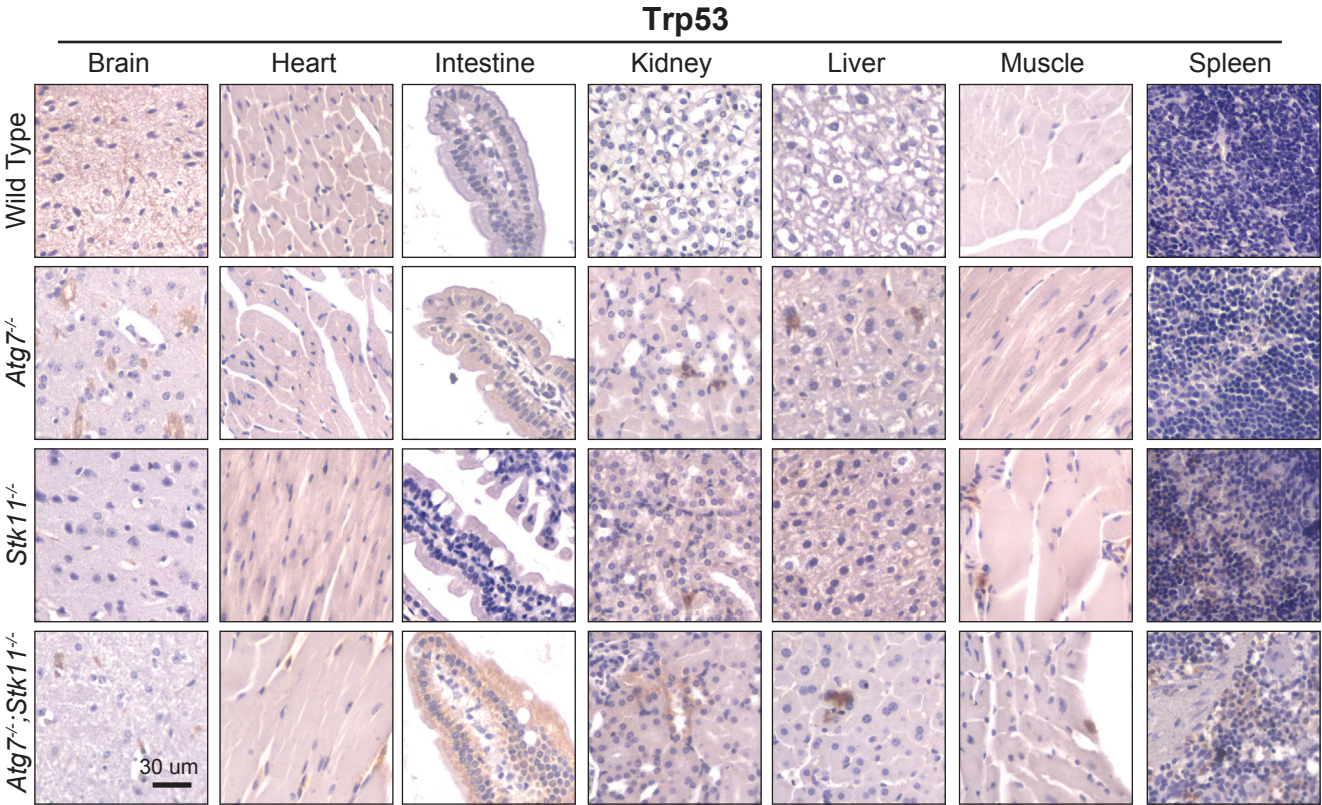

Supplement: supp [file elife-62377-supp-v1.zip › elife_poa_e62377_Figure_4_figure_supplement_1.pdf]
